# Supplementary material
Source: PubMed Central journal article supplement (PMC5161658)

Extended Data Figure 1.

a

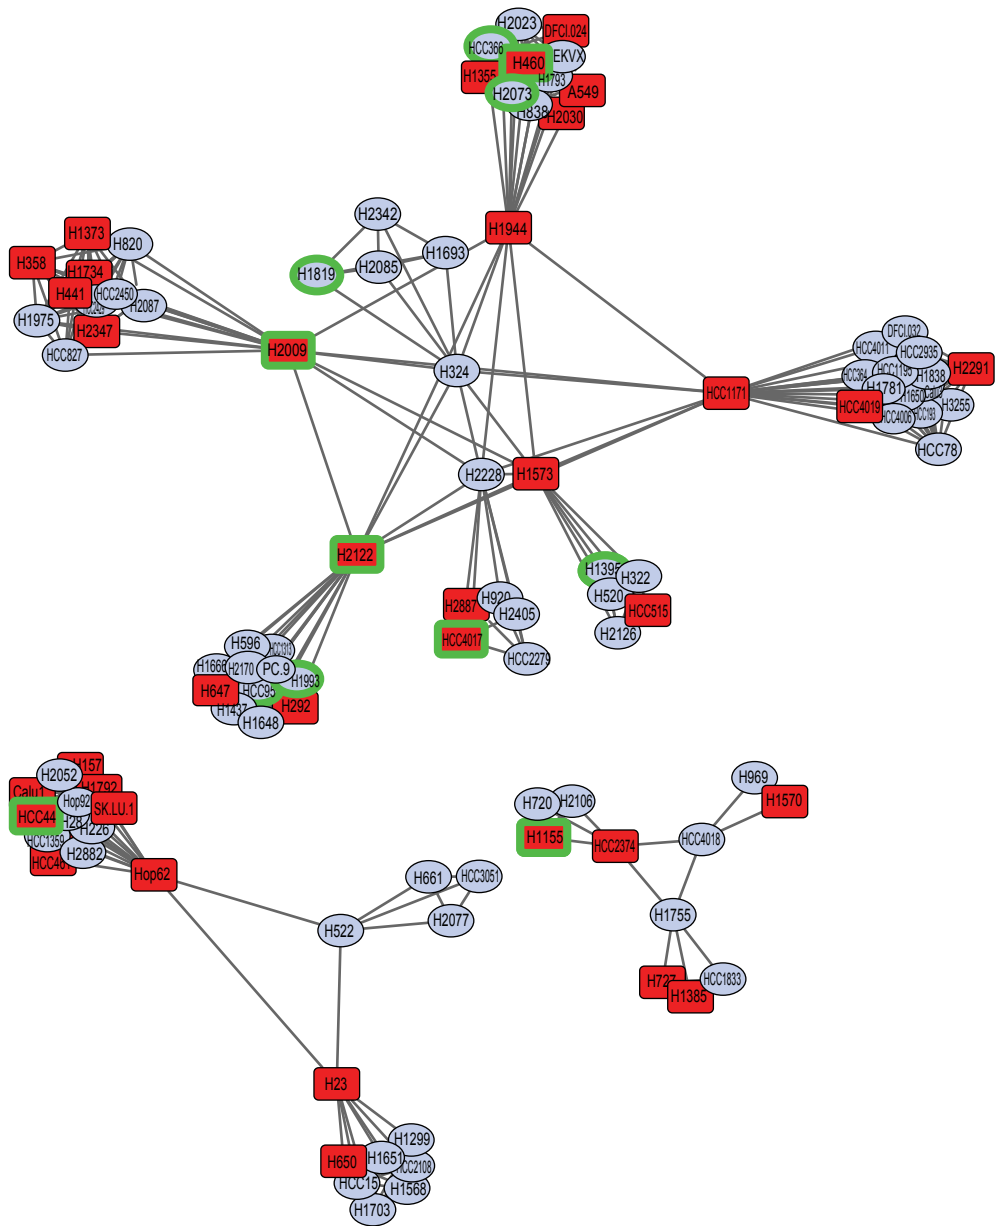



**Extended Data Figure 2.**

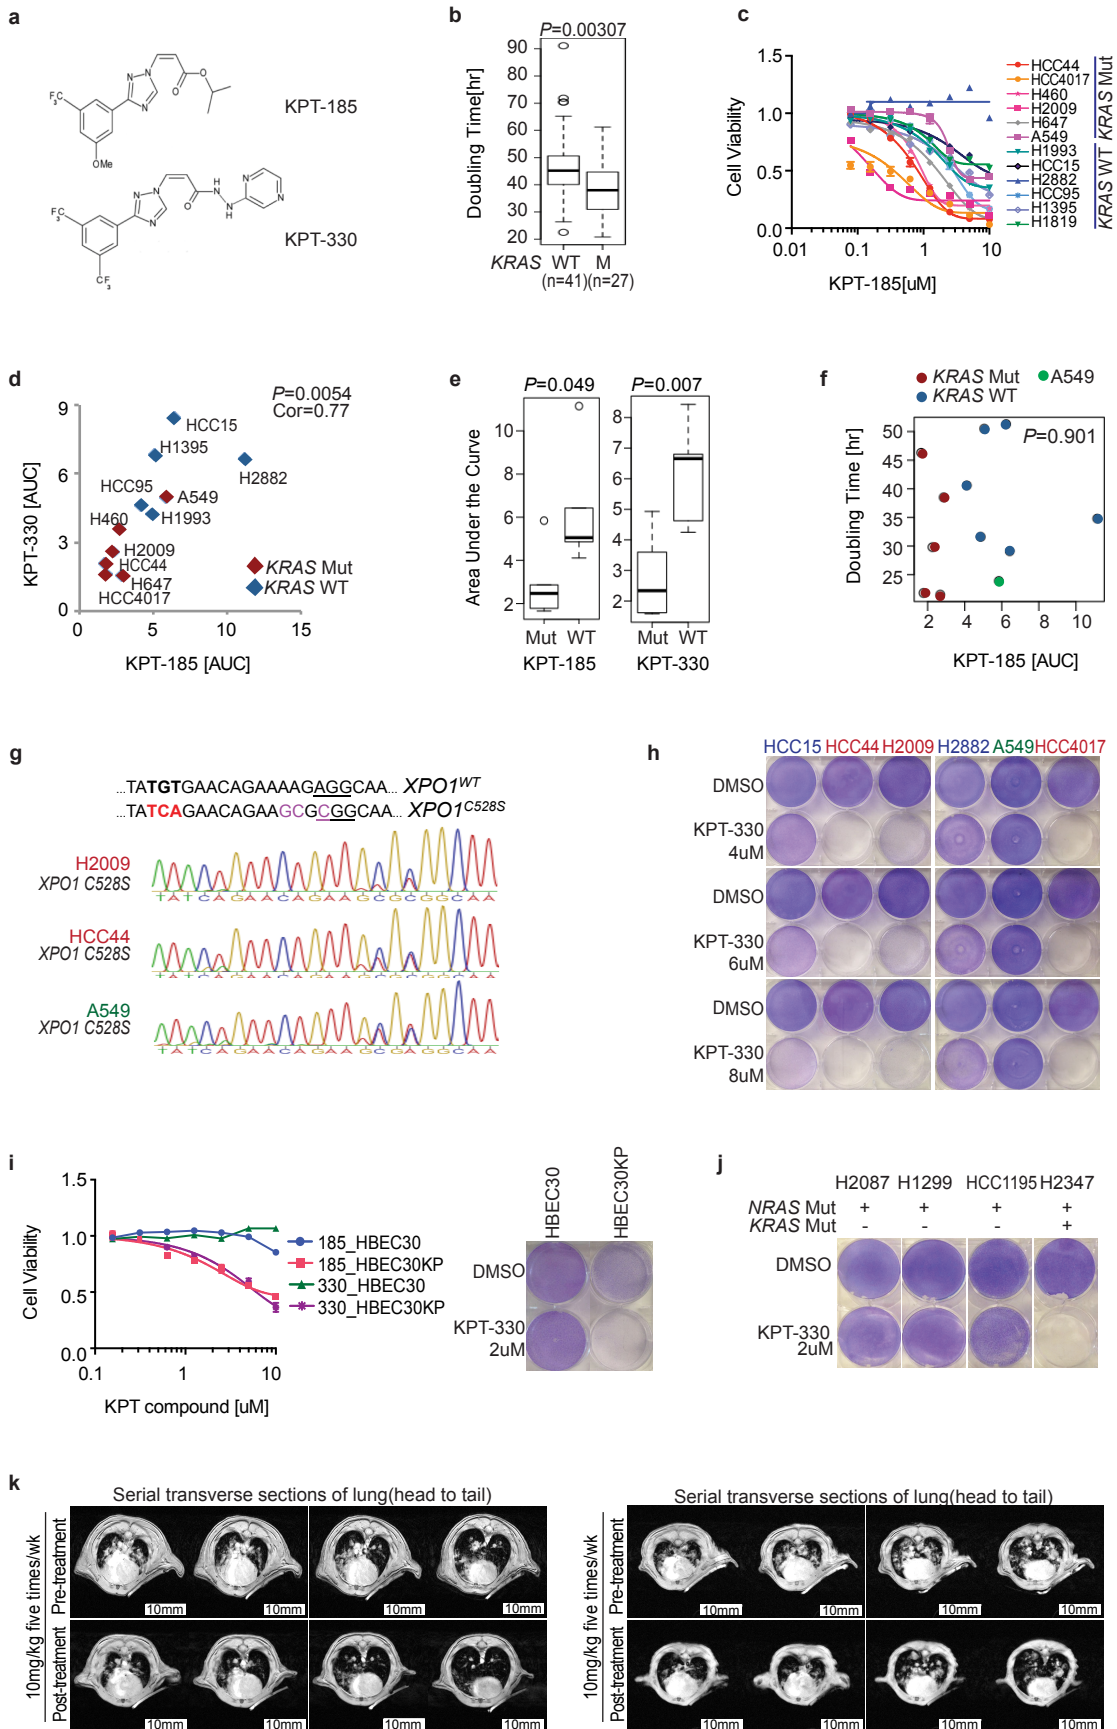

Extended Data Figure 3.

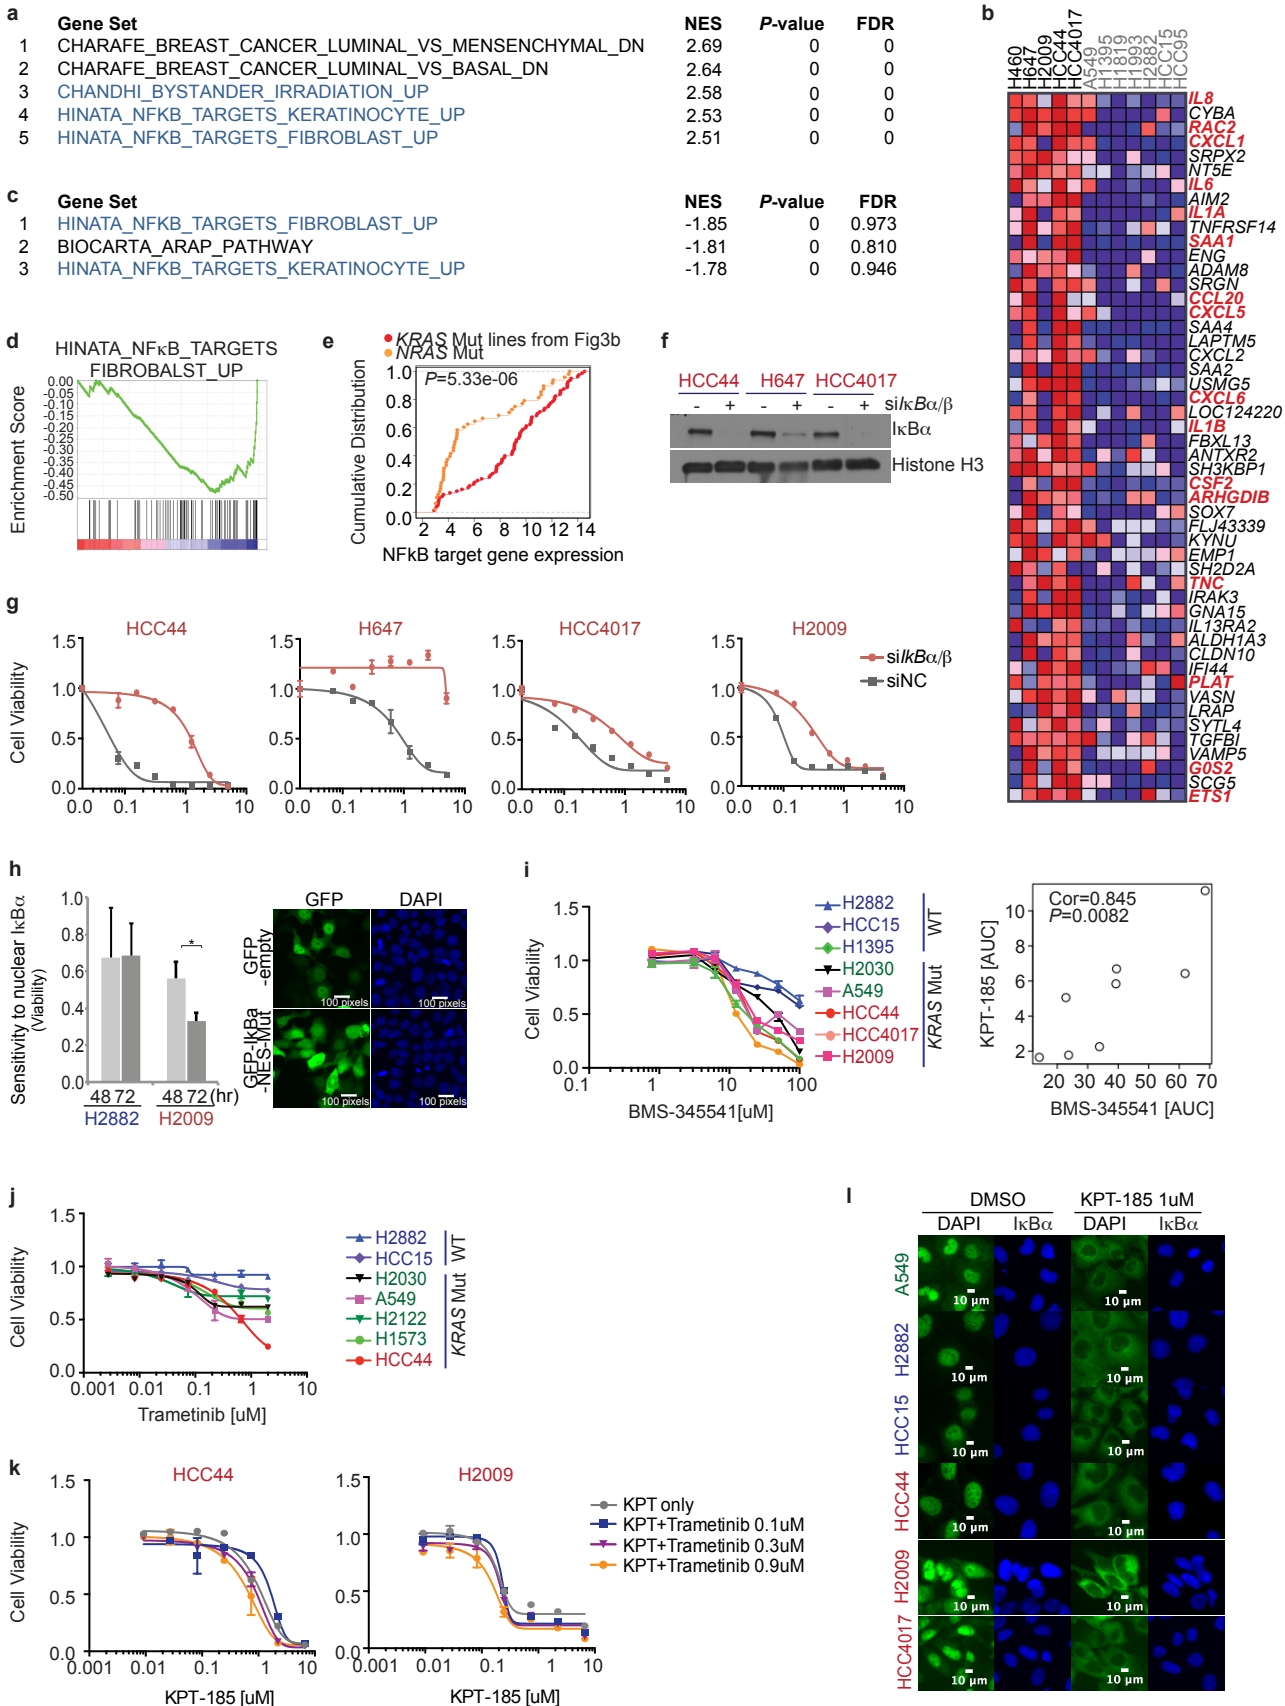



Extended Data Figure 4.

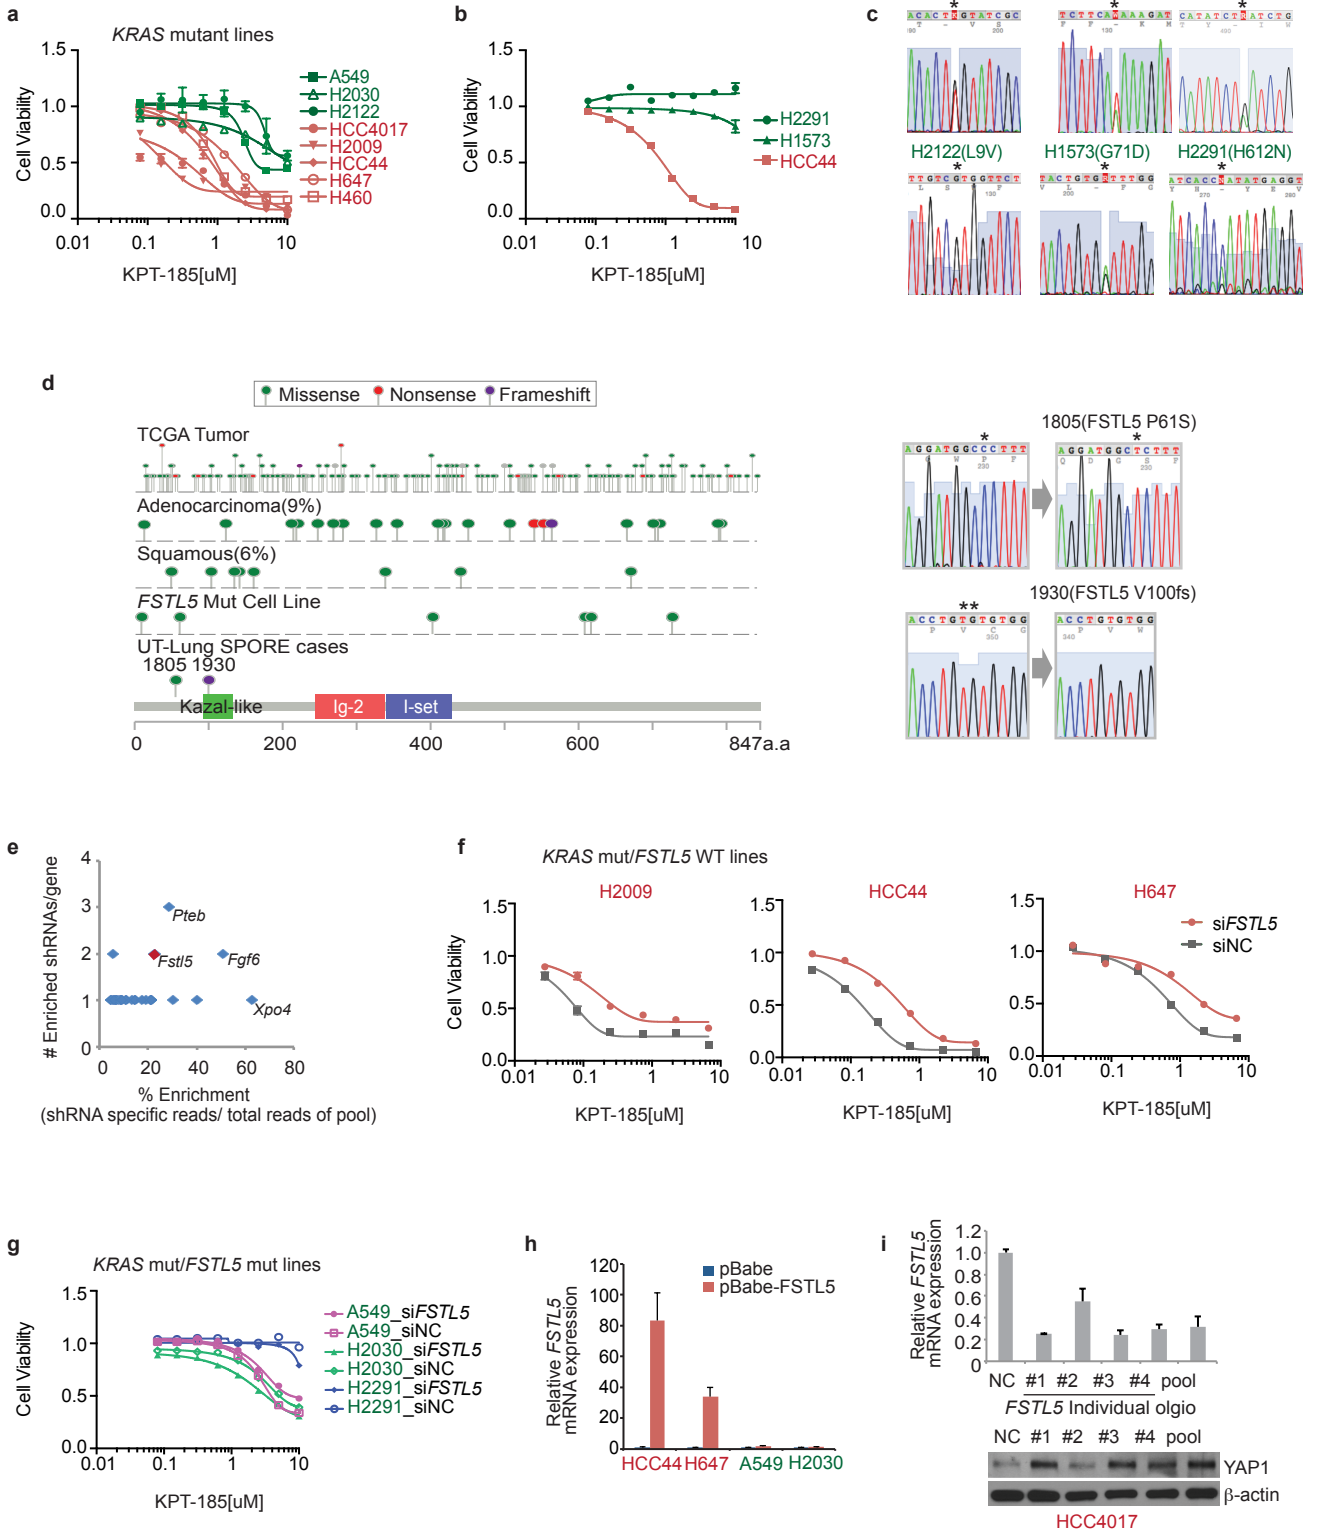

Extended Data Figure 4. (Continued)

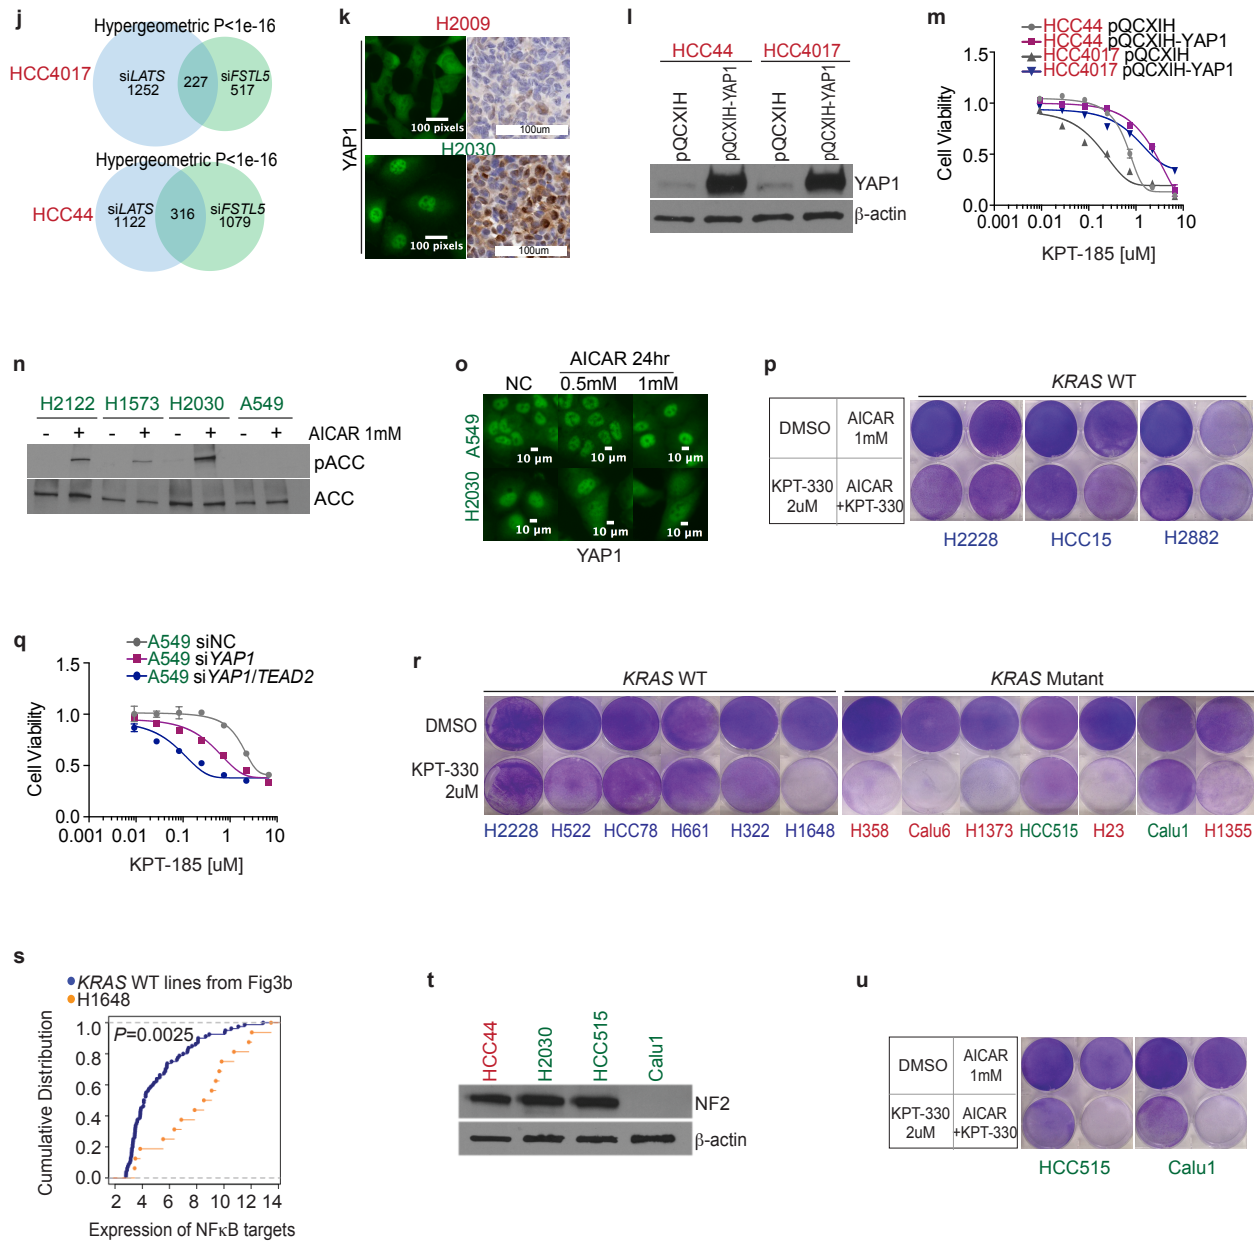

Supplement: NIHMS820730-supplement-Extended_Data_Figure_Set.pdf [file NIHMS820730-supplement-Extended_Data_Figure_Set.pdf]
